# Supplementary material for: CdS aerogels as efficient photocatalysts for degradation of organic dyes under visible light irradiation
Source: Royal Society of Chemistry journal article supplement (doi:10.1039/c7qi00140a), 2017-01-01
Supplement: c7qi00140a1.pdf [file c7qi00140a1.pdf]

Electronic Supplemental Information (ESI) for

# CdS Aerogels as Efficient Photocatalysts for Degradation of Organic Dyes under Visible Light Irradiation

*Lasantha Korala,<sup>‡,a</sup> Jason R. Germain,<sup>‡,a</sup> Erica Chen,<sup>a</sup> Irina R. Pala,<sup>a</sup> Da Li,<sup>a</sup> Stephanie L. Brock<sup>\*,1</sup>*

<sup>a</sup>Department of Chemistry, Wayne State University, Detroit, Michigan 48202, USA

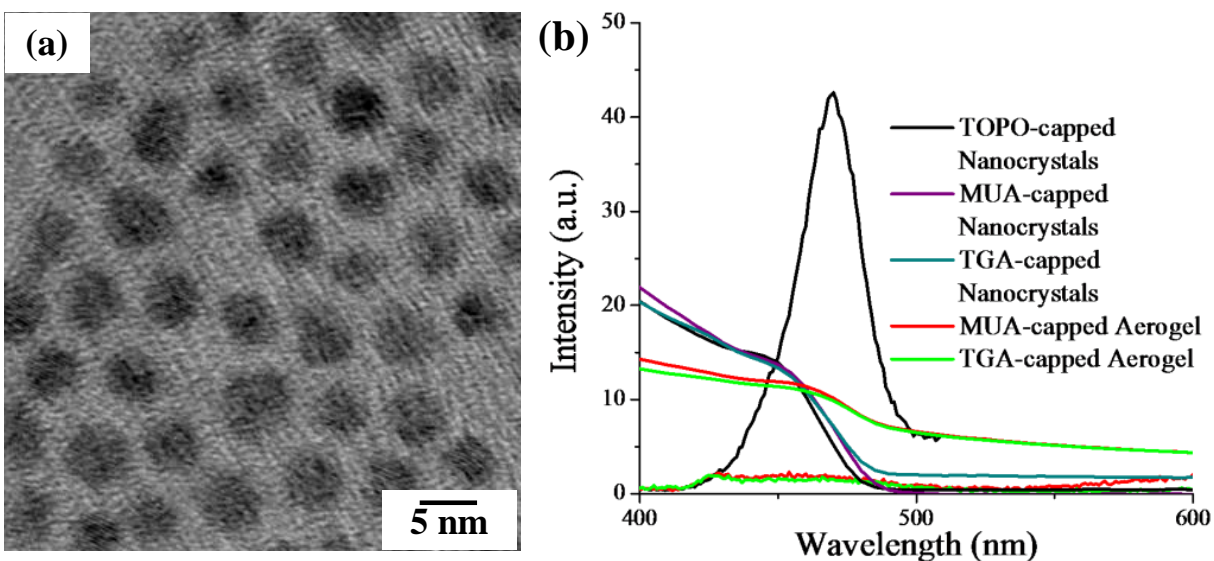

<sup>1</sup>Department of Chemistry, Wayne State University, Detroit, MI 48202, United States; Email: [sbrock@chem.wayne.edu](mailto:sbrock@chem.wayne.edu)

<sup>‡</sup>These authors contributed equally

**Fig. S1.** (a) High-resolution TEM image of TOPO-capped CdS NCs and (b) UV–vis and PL spectra of TOPO-capped, MUA-capped and thioglycolic acid (TGA)-capped CdS NCs and aerogels assembled from MUA and TGA-capped CdS NCs.

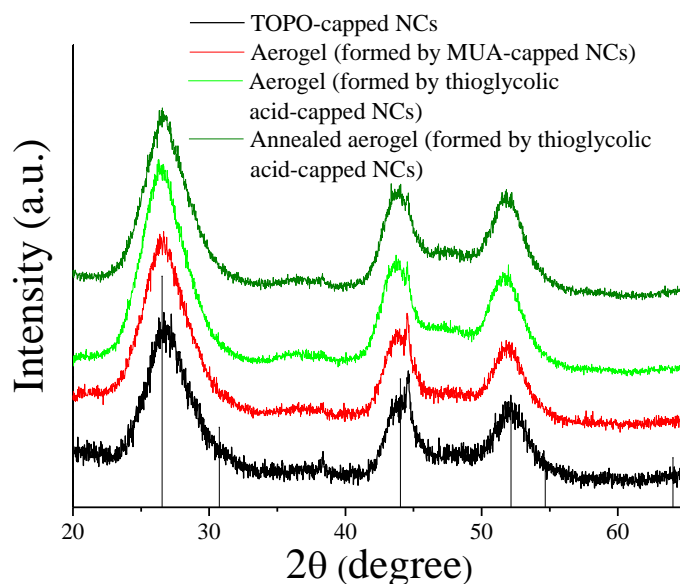

**Fig. S2** PXRD patterns of TOPO-Capped CdS NCs, and aerogels synthesized by MUA- and thioglycolic acid-capped NCs. The line diagram corresponds to bulk cubic CdS (from ISCD pattern PDF # 80-0019).

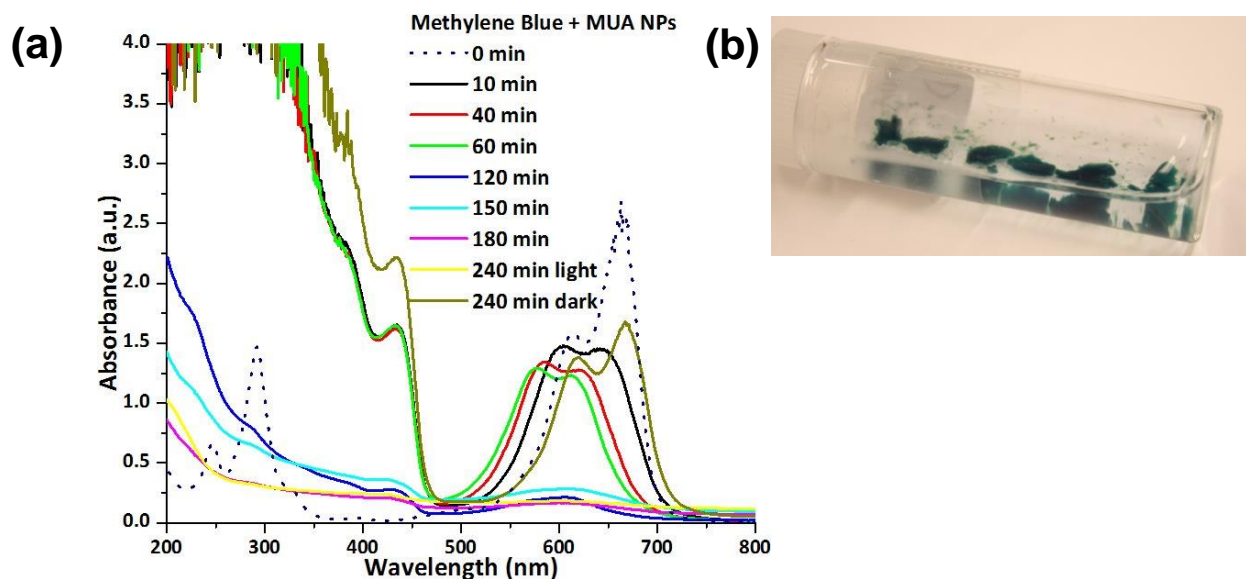

**Fig. S3.** (a) UV/vis spectra as a function of time for photocatalysis of MB dye by MUA-capped CdS nanoparticles; (b) photograph of MUA-capped CdS nanoparticle + MB dye after the

experiment. The photocatalytic reaction results in corrosion of the nanoparticles, leading to aggregation. Dye absorption by the resulting wet gels is a significant contributor to the decolorization process.

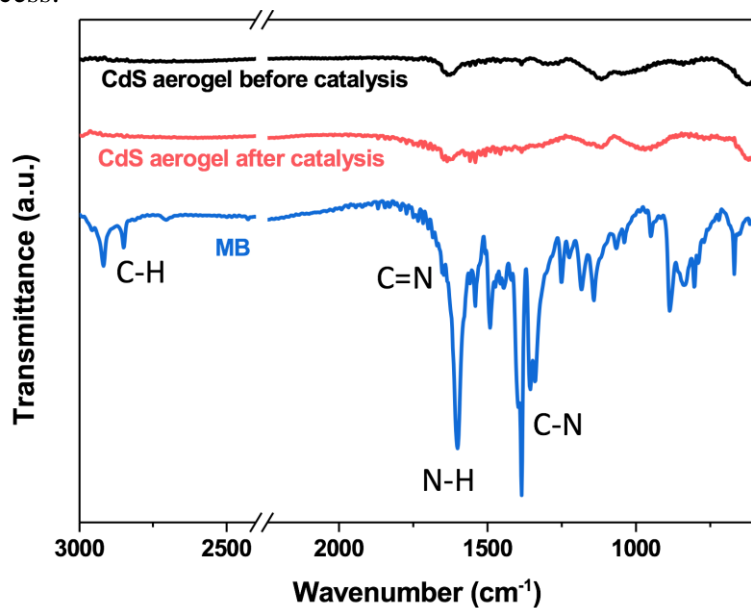

**Fig. S4.** FT-IR spectra of MB dye and the TGA-capped CdS aerogels (annealed) before and after catalysis.

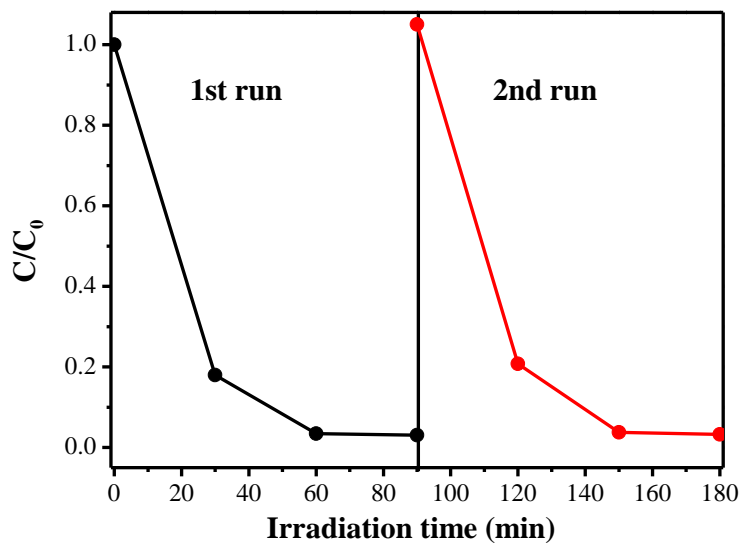

**Fig. S5.** Recycling test for the photodegradation of MB using the TGA-capped CdS aerogels (annealed).
